# Supplementary material for: Geometric and electronic structure of multilayered graphene: synergy of the nondirective ripples and the number of layers
Source: Royal Society of Chemistry journal article supplement (doi:10.1039/c7cp06446b), 2017-12-18
Supplement: c7cp06446b1.pdf [file c7cp06446b1.pdf]

**Supplemental Materials for “Geometric and Electronic  
Structure of Multilayered Graphene: Synergy of The  
Nondirective Ripples and The Number of Layers”**

**Table S1.** The binding energies (meV/atom) of bi-layer rippled graphene with 0.05 eV/ Å and 0.01 eV/ Å for the force.

|                              | Force criterion<br>(eV/ Å) | Compression ratio (%) |        |        |        |
|------------------------------|----------------------------|-----------------------|--------|--------|--------|
|                              |                            | 5                     | 10     | 15     | 20     |
| Binding energy<br>(meV/atom) | 0.05                       | 9.929                 | 9.345  | 10.345 | 11.129 |
|                              | 0.01                       | 9.969                 | 10.392 | 10.248 | 11.434 |

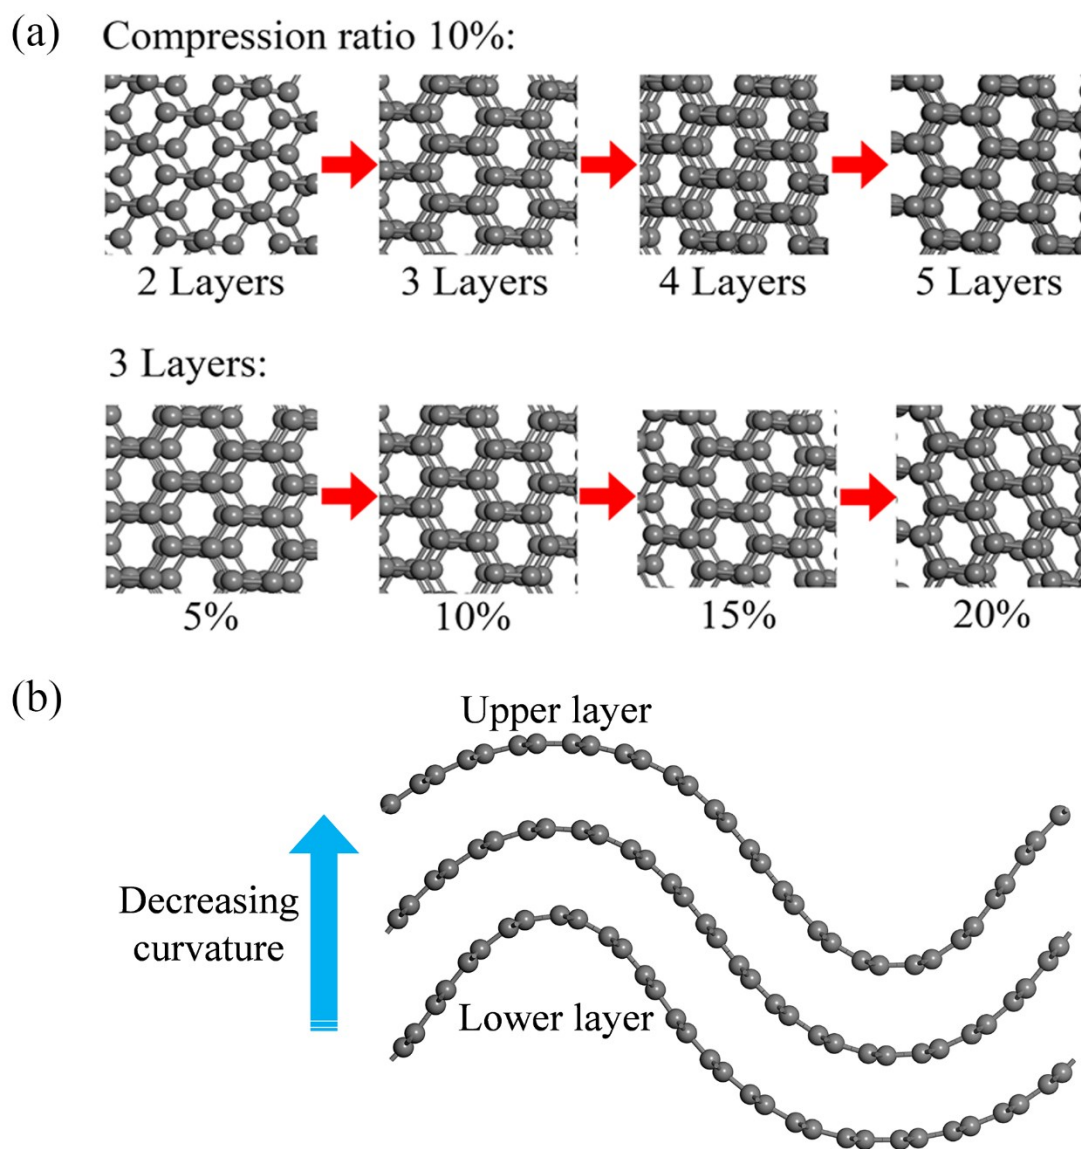

**Figure S1.** (a) The change of stacking modes of 2~5 layers of rippled graphene with the compression ratio of 10% (the first row) and tri-layer graphene with the compression ratio of 5%~20% (the second row). (b) The multilayered graphene with ripples is consisted of monolayer graphene with different curvature, displaying gradually decreasing curvature from the inner layer to the outer layer.

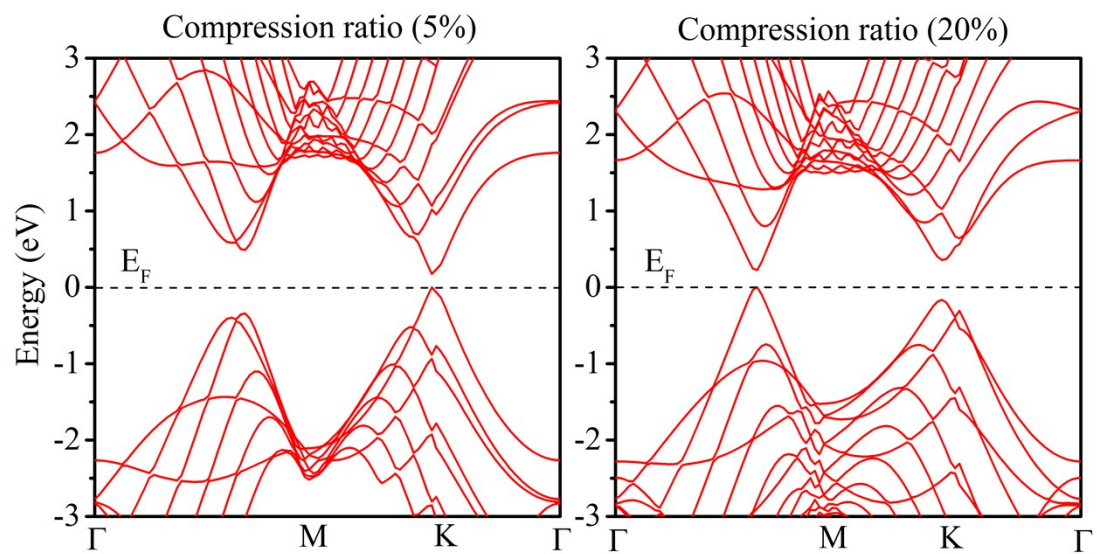

**Figure S2.** The band structures of monolayer rippled graphene with compression ratio of 5% and 20%.

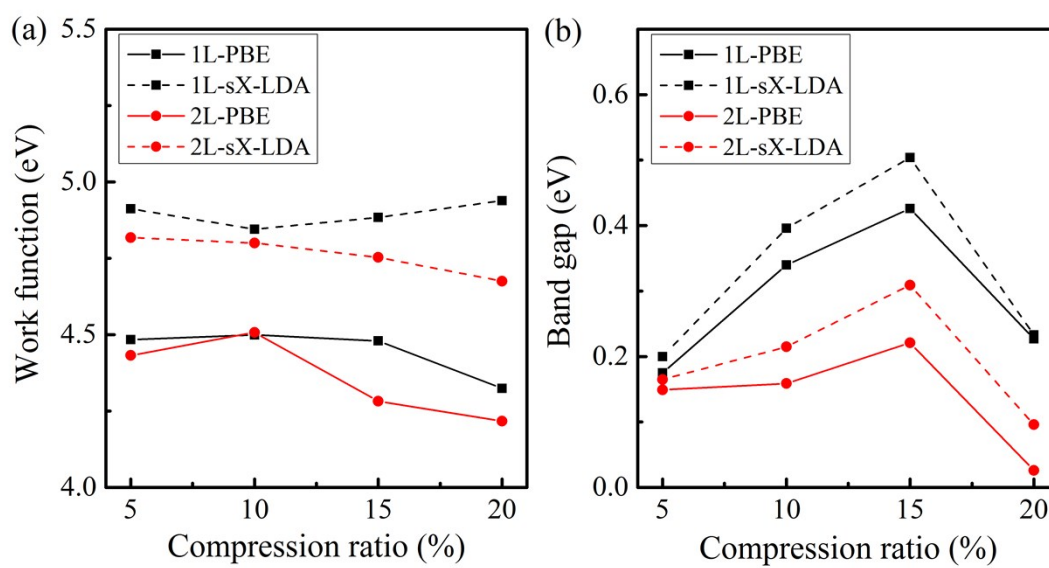

**Figure S3.** The (a) work function and the (b) band gap of monolayer and bi-layer rippled graphene using PBE (solid lines) and sX-LDA (dashed).

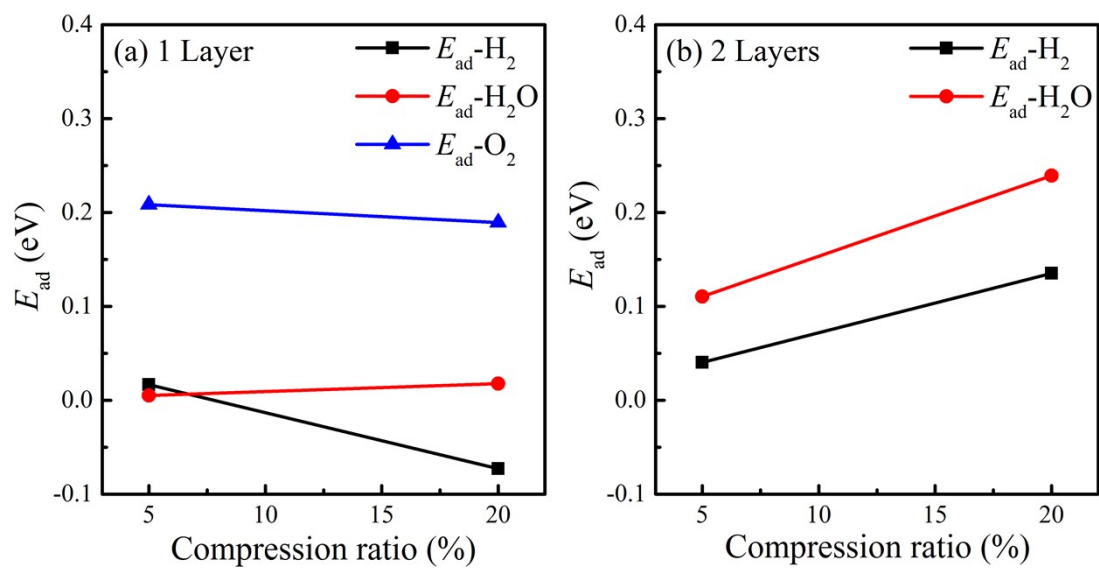

**Figure S4.** The adsorption energies of (a)  $\text{H}_2$ ,  $\text{H}_2\text{O}$  and  $\text{O}_2$  on monolayer rippled graphene and (b)  $\text{H}_2$  and  $\text{H}_2\text{O}$  on bi-layer rippled graphene.
